# Supplementary material for: HIV-1 Transmission Patterns in Men Who Have Sex with Men: Insights from Genetic Source Attribution Analysis
Source: PubMed Central journal article supplement (PMC6735327; doi:10.1089/aid.2018.0236), 2019-08-30
Supplement: Supp_FigureS1.pdf [file Supp_FigureS1.pdf]

## Supplementary Data

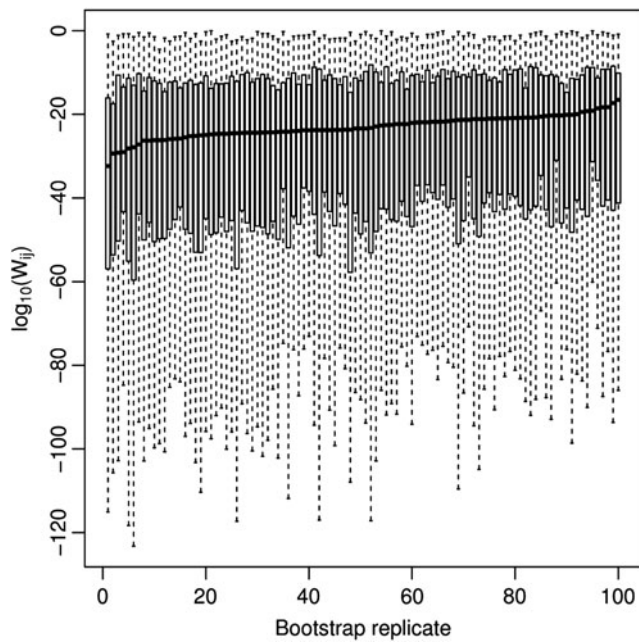

**SUPPLEMENTARY FIG. S1.** Distribution of infector probabilities across 100 bootstrap replicates. To illustrate the variability of estimates between bootstrap replicates, a random sample of 100 probabilities (in logarithm) per replicate is represented. Results are sorted in increasing order of the median value. Outliers are not shown.
